# Supplementary material for: Nitrate source identification in the Baltic Sea using its isotopic ratios in combination with a Bayesian isotope mixing model
Source: Copernicus journal article supplement (doi:10.5194/bg-11-4913-2014), 2014-09-15
Supplement: Supplementary file 1 [file bg-11-4913-2014-supplement.pdf]

Supplement of Biogeosciences, 11, 4913–4924, 2014  
<http://www.biogeosciences.net/11/4913/2014/>  
doi:10.5194/bg-11-4913-2014-supplement  
© Author(s) 2014. CC Attribution 3.0 License.

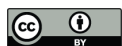

*Supplement of*

## **Nitrate source identification in the Baltic Sea using its isotopic ratios in combination with a Bayesian isotope mixing model**

**F. Korth et al.**

*Correspondence to:* F. Korth ([frederike.korth@io-warnemuende.de](mailto:frederike.korth@io-warnemuende.de))

1 **1 Supplement 1**

2 Table S1: Overview of the sampling stations (location and selected chemical parameters).

| Area                  | Date       | Latitude | Longitude | Salinity | NO <sub>3</sub> <sup>-</sup> +NO <sub>2</sub> <sup>-</sup><br>[μMol] | δ <sup>15</sup> N (‰) | δ <sup>18</sup> O (‰) |
|-----------------------|------------|----------|-----------|----------|----------------------------------------------------------------------|-----------------------|-----------------------|
| Western<br>Baltic Sea | 11.02.2008 | 12,4498  | 54,6503   | 8,87     | 3,79                                                                 | 4,8                   | 3,4                   |
|                       | 11.02.2008 | 12,7056  | 54,6959   | 9,22     | 3,81                                                                 | 4,3                   | 3,5                   |
|                       | 11.02.2008 | 13,0583  | 54,7950   | 8,51     | 4,26                                                                 | 4,7                   | 4,4                   |
|                       | 11.02.2008 | 13,2770  | 54,8598   | 8,20     | 2,71                                                                 | 5,0                   | 5,2                   |
|                       | 12.02.2008 | 13,9460  | 54,7099   | 7,73     | 2,81                                                                 | 4,7                   | 3,0                   |
|                       | 12.02.2008 | 13,9886  | 55,0624   | 7,73     | 3,04                                                                 | 5,0                   | 3,1                   |
|                       | 12.02.2008 | 14,1578  | 54,0763   | 5,98     | 46,25                                                                | 8,0                   | 1,8                   |
| Baltic<br>Proper      | 12.02.2008 | 14,2827  | 54,6338   | 7,74     | 2,97                                                                 | 3,9                   | 0,0                   |
|                       | 25.02.2009 | 15,5695  | 55,5169   | 7,76     | 2,80                                                                 | 3,3                   | 4,5                   |
|                       | 25.02.2009 | 17,5808  | 57,2238   | 7,1      | 3,44                                                                 | 1,5                   | -0,9                  |
|                       | 26.02.2009 | 17,3519  | 57,7003   | 7,01     | 3,52                                                                 | 3,1                   | 0,1                   |
|                       | 26.02.2009 | 18,2335  | 58,5837   | 6,45     | 3,79                                                                 | 2,0                   | -0,4                  |
|                       | 26.02.2009 | 19,8832  | 59,7502   | 5,65     | 3,70                                                                 | 2,5                   | -0,8                  |
|                       | 12.02.2008 | 14,5376  | 55,4046   | 7,71     | 3,13                                                                 | 4,4                   | -0,8                  |
|                       | 13.02.2008 | 14,7156  | 55,4659   | 7,68     | 3,23                                                                 | 3,9                   | 0,3                   |
|                       | 13.02.2008 | 15,3344  | 55,3835   | 7,51     | 3,07                                                                 | 3,6                   | -0,4                  |
|                       | 13.02.2008 | 15,6326  | 55,4564   | 7,48     | 2,95                                                                 | 3,5                   | 0,0                   |
|                       | 13.02.2008 | 15,9834  | 55,2501   | 7,62     | 3,54                                                                 | 4,0                   | -1,0                  |
|                       | 19.02.2008 | 15,9837  | 55,2498   | 7,64     | 3,27                                                                 | 4,3                   | -1,1                  |
|                       | 19.02.2008 | 17,0665  | 55,2168   | 7,45     | 3,24                                                                 | 3,5                   | -1,0                  |
|                       | 19.02.2008 | 18,2351  | 55,3266   | 7,37     | 2,91                                                                 | 3,4                   | -1,6                  |
|                       | 19.02.2008 | 18,4013  | 55,5502   | 7,34     | 2,61                                                                 | 4,0                   | -1,6                  |
|                       | 18.02.2008 | 18,6002  | 55,6339   | 7,37     | 2,76                                                                 | 3,8                   | -1,3                  |
|                       | 18.02.2008 | 18,8658  | 55,8413   | 7,37     | 2,88                                                                 | 4,8                   | 1,6                   |
| 18.02.2008            | 19,1677    | 56,0841  | 7,37      | 2,71     | 4,3                                                                  | 2,0                   |                       |
| 18.02.2008            | 19,5833    | 56,6334  | 7,34      | 3,46     | 3,8                                                                  | -1,7                  |                       |
| 18.02.2008            | 19,8289    | 57,0713  | 7,34      | 3,34     | 3,4                                                                  | -2,0                  |                       |
| 16.02.2008            | 20,0506    | 57,3196  | 7,35      | 3,38     | 2,6                                                                  | -2,7                  |                       |
| Gulf of<br>Finland    | 04.03.2009 | 24,8500  | 59,8036   | 5,24     | 6,82                                                                 | 4,1                   | -0,2                  |
|                       | 04.03.2009 | 25,6325  | 59,8659   | 5,09     | 8,12                                                                 | 6,4                   | -1,4                  |
|                       | 04.03.2009 | 23,9989  | 59,6836   | 5,35     | 8,77                                                                 | 6,6                   | -1,4                  |
|                       | 04.03.2009 | 22,9002  | 59,4836   | 6,11     | 6,95                                                                 | 6,4                   | -1,5                  |
| Gulf of<br>Bothnia    | 27.02.2009 | 19,1177  | 60,1913   | 5,42     | 3,10                                                                 | 2,9                   | 0,7                   |
|                       | 27.02.2009 | 19,1464  | 60,6967   | 5,45     | 3,81                                                                 | 2,9                   | -1,1                  |
|                       | 27.02.2009 | 19,2836  | 61,2265   | 5,54     | 3,96                                                                 | 5,8                   | -0,1                  |
|                       | 27.02.2009 | 19,4678  | 61,7032   | 5,57     | 3,40                                                                 | 2,4                   | -1,1                  |
|                       | 27.02.2009 | 19,7182  | 62,1441   | 5,45     | 3,49                                                                 | 3,2                   | -1,8                  |
|                       | 28.02.2009 | 19,9682  | 62,5872   | 5,52     | 3,66                                                                 | 1,8                   | -2,2                  |
|                       | 28.02.2009 | 20,4862  | 63,0417   | 5,54     | 4,31                                                                 | 4,0                   | -0,7                  |
|                       | 20.11.2011 | 21,584   | 63,834    | 3,1      | 5,53                                                                 | 1,83                  | -2,79                 |
| Southern              | 15.11.2009 | 21,38187 | 55,30128  | 0        | 145,03                                                               | 10,0                  | 1,5                   |

|                 |            |          |          |   |        |      |      |
|-----------------|------------|----------|----------|---|--------|------|------|
| Rivers          | 01.12.2009 | 21,38187 | 55,30128 | 0 | 179,18 | 9,0  | 1,3  |
|                 | 07.12.2009 | 21,13293 | 55,69043 | 0 | 114,87 | 10,0 | 1,7  |
|                 | 22.02.2010 | 21,13293 | 55,69043 | 0 | 140,47 | 8,8  | 1,3  |
|                 | 17.01.2003 | 12,1429  | 54,03246 | 0 | 259,00 | 8,2  | 6,5  |
|                 | 13.02.2003 | 12,1429  | 54,03246 | 0 | 135,00 | 9,3  | 6,5  |
| Northern rivers | 11.11.2009 | 22,8415  | 65,9335  | 0 | 7,41   | 1,6  | 10,6 |
